# Supplementary material for: Spatial distribution of soil nutrients and evaluation of cultivated land in Xuwen county
Source: PeerJ. 2022 Jun 30;10:e13239. doi: 10.7717/peerj.13239 (PMC9250764; doi:10.7717/peerj.13239)
Supplement: Supplemental Information 1 [file peerj-10-13239-s001.xlsx]

## Sheet: Original data
Order number	East longitude(X)	North latitude(Y)	pH	Available phosphorus(mg/kg)	Organic matter(g/kg)	Available potassium(mg/kg)	Alkali-hydrolyzable nitrogen(mg/kg)	IFI index（pH、C、N、P、K）
1	110.287	20.2708	6.2	123.226	39.339	346.859	149.5	0.938605
2	110.35	20.6081	5.02	288.691	30.0026	233.543	129.9	0.798316
3	110.272	20.3228	4.2	220.921	26.4805	516.833	128.5	0.741283
4	110.408	20.4654	4.15	145.891	50.9926	124.274	227.8	0.757909
5	110.292	20.4088	4.2	36.7333	50.2616	184.979	215.3	0.820026
6	110.016	20.4382	4.8	55.4908	21.9073	189.026	101.9	0.675063
7	110.278	20.5154	4.17	84.9295	37.3417	472.316	141.1	0.823845
8	110.018	20.3953	4.45	140.941	23.3242	367.094	99.2	0.676375
9	110.011	20.386	5.27	52.8856	17.4591	265.919	104.7	0.690917
10	110.017	20.4361	5.14	7.29456	9.38208	265.919	64.1	0.380545
11	109.939	20.3328	6.9	150.32	19.9362	492.551	92.4	0.74969
12	109.976	20.33	5.62	288.691	19.8571	419.705	118.7	0.746896
13	109.971	20.3611	4.56	141.202	31.0699	630.149	138.3	0.801125
14	110.383	20.3133	5.36	61.4827	32.451	233.543	122.9	0.812138
15	109.958	20.3467	5.56	43.5068	35.6397	322.577	138.3	0.868745
16	110.024	20.346	4.26	156.573	29.9726	326.624	128.5	0.762717
17	110.416	20.4389	4.67	84.148	39.1526	205.214	104.7	0.782296
18	110.233	20.3097	4.4	113.847	48.8249	87.851	176.1	0.721878
19	110.497	20.4392	6.74	50.0198	10.6323	59.522	37.5	0.447404
20	110.288	20.4994	4.18	21.6232	28.9013	193.073	132.3	0.651077
21	110.464	20.3983	6.35	229.518	31.4769	83.804	103.6	0.661595
22	110.498	20.4553	6.09	40.9016	31.2895	132.368	92.2	0.688974
23	110.449	20.4611	5.6	99.5186	44.126	140.462	138.4	0.817762
24	110.474	20.4156	5.79	175.59	45.9942	87.851	145.5	0.772568
25	110.472	20.4069	5.6	273.807	42.7257	43.334	130.7	0.686209
26	110.465	20.5626	6.37	40.1201	48.679	43.334	181.8	0.757875
27	110.431	20.5728	4.26	288.691	53.2486	47.381	207	0.667265
28	110.17	20.3084	6.22	116.192	25.3582	367.094	96.4	0.757767
29	110.17	20.3024	6.36	85.4506	27.7811	294.248	124.9	0.833863
30	110.173	20.3055	6.37	17.9759	23.2318	172.838	127.2	0.658255
31	110.478	20.4156	6.87	190.44	31.08	184.979	94.3	0.793091
32	110.161	20.3064	6.28	66.6931	47.0607	298.295	190.2	0.94661
33	110.482	20.425	6.47	119.579	47.62	298.295	131.8	0.918369
34	110.271	20.5973	5.38	92.7451	24.9104	148.556	114.6	0.689623
35	110.498	20.4253	6.64	103.947	64.9894	148.556	196.4	0.896015
36	110.174	20.3668	3.98	249.318	33.1271	156.65	139.8	0.718825
37	110.151	20.3042	5.56	248.276	11.1979	338.765	120.7	0.70156
38	110.442	20.3619	5.75	165.17	64.8596	55.475	202.2	0.73828
39	110.103	20.3315	4.9	237.073	27.0416	383.282	128.6	0.774573
40	110.197	20.4652	4.37	168.817	26.267	241.637	130	0.750431
41	110.277	20.4269	4.2	92.7451	19.6993	168.791	96.3	0.600193
42	110.383	20.4235	4.19	34.1281	15.2354	87.851	78.1	0.403019
43	110.333	20.4935	4.45	38.557	41.2845	156.65	160.7	0.804422
44	110.372	20.5162	5.73	5.47092	28.7373	108.086	118.1	0.490346
45	110.332	20.4959	4.67	116.973	31.1955	257.825	124.4	0.778727
46	110.392	20.3378	6.23	233.165	24.2543	241.637	95	0.749436
47	110.29	20.4531	4.27	53.1461	40.208	290.201	120.2	0.800695
48	110.353	20.3611	4.48	288.691	35.4251	274.013	197.3	0.844608
49	110.408	20.3306	4.92	105.511	30.7272	87.851	159.4	0.694135
50	110.348	20.3194	4.46	197.214	32.9618	310.436	121.6	0.773647
51	110.339	20.2894	5.98	15.8917	17.2264	180.932	75.1	0.503802
52	110.312	20.3153	6.65	56.7934	54.1154	55.475	159.4	0.776928
53	110.366	20.4533	4.4	82.3243	41.2432	322.577	181.7	0.865877
54	110.399	20.3242	4.9	82.0638	27.5862	83.804	125.8	0.622718
55	110.396	20.4382	4.42	5.99196	42.6357	79.757	177.6	0.525203
56	110.272	20.2831	6.15	19.7995	24.846	359	104.5	0.657035
57	110.378	20.3556	6.29	94.0477	29.5653	407.564	102.4	0.795492
58	110.407	20.4584	4.37	56.0118	37.8325	140.462	172	0.776438
59	110.321	20.3153	6.69	92.4846	37.6739	95.945	122.2	0.762449
60	110.426	20.6468	5.46	25.2704	22.5763	23.099	100.3	0.444254
61	110.113	20.355	6.31	19.018	27.2044	249.731	110.5	0.684341
62	109.913	20.4044	6.18	92.2241	27.3418	354.953	104.4	0.782761
63	110.495	20.4364	4.95	135.991	16.489	233.543	86.3	0.635137
64	110.233	20.5076	4.88	16.1522	35.3609	87.851	135.6	0.557409
65	110.218	20.3977	6.86	33.6071	27.0686	282.107	114.5	0.795508
66	110.46	20.6089	6.78	7.55508	11.448	59.522	34.8	0.274987
67	110.44	20.6318	5.41	45.8515	4.54148	27.146	37.6	0.353049
68	110.264	20.3156	4.39	127.394	35.5372	197.12	127.2	0.792051
69	110.142	20.4312	6.08	21.1021	23.4624	132.368	110.4	0.578686
70	110.492	20.4306	5.63	108.897	18.9094	136.415	77.9	0.578964
71	110.121	20.3735	5.22	26.052	25.8642	415.658	123	0.694003
72	110.503	20.4464	6.65	26.573	25.897	415.658	104.7	0.721856
73	110.172	20.3038	4.91	79.4586	19.6268	427.799	85.2	0.648163
74	109.998	20.33	5.71	176.633	37.4893	407.564	163.6	0.908574
75	109.942	20.3236	7.56	86.7532	33.0277	269.966	166.4	0.96135
76	110.506	20.4285	4.97	39.3385	53.4788	342.812	207	0.886715
77	110.231	20.51	4.89	16.6733	11.4251	128.321	58.6	0.332215
78	110.497	20.4287	5.68	123.747	17.0895	359	106.2	0.709527
79	110.304	20.5928	4.73	105.25	7.98557	306.389	40.4	0.52717
80	109.941	20.325	8.03	56.2723	33.1708	282.107	115.5	0.893122
81	110.227	20.4432	4.27	24.2284	10.2889	136.415	60	0.351422
82	110.145	20.3034	5.32	216.492	23.8801	492.551	145.1	0.808537
83	110.297	20.5875	4.2	42.7253	41.5239	136.415	138.4	0.752445
84	110.021	20.3913	4.8	215.45	40.3444	342.812	108.7	0.800454
85	110.226	20.5107	4.16	40.1201	36.9427	160.697	130	0.748597
86	110.206	20.3139	6.71	206.332	35.9676	468.269	145.4	0.9341
87	110.139	20.47	4.76	25.531	11.552	160.697	53	0.417631
88	109.944	20.3708	7.22	84.9295	35.2886	399.47	156.3	0.961535
89	110.192	20.5152	4.64	91.9636	35.859	302.342	125.8	0.805422
90	109.928	20.3917	6.3	85.7111	30.6231	278.06	89.1	0.775034
91	110.112	20.3145	5.8	260.781	26.6753	371.141	103.4	0.760844
92	110.16	20.3169	5.74	288.691	26.5413	407.564	134.9	0.820544
93	110.173	20.2819	5.03	270.159	25.2335	221.402	83.8	0.680792
94	110.19	20.5195	4.28	11.7234	50.3894	176.885	236.2	0.675442
95	110.275	20.2914	6.48	35.4307	49.5058	261.872	227.7	0.930054
96	110.197	20.3801	4.49	112.545	21.7654	419.705	116	0.703275
97	110.182	20.4681	4.41	110.46	25.3858	112.133	122.7	0.619969
98	109.965	20.3272	6.1	141.202	50.139	310.436	213.6	0.93888
99	110.117	20.5051	3.69	133.126	12.7369	229.496	54.4	0.504779
100	109.969	20.355	7.22	47.9357	8.95934	265.919	99.2	0.717756
101	110.079	20.4139	4.92	123.486	12.3589	233.543	95	0.628946
102	110.13	20.4531	6.11	140.42	26.958	79.757	170.6	0.714491
103	110.306	20.5222	4.79	57.0539	52.546	533.021	240.3	0.882625
104	110.461	20.6389	8.18	13.2865	18.4734	55.475	107.8	0.465786
105	110.372	20.6309	5.75	68.2562	27.9987	172.838	191.6	0.824167
106	109.991	20.3056	7.04	103.687	52.4414	124.274	131.1	0.844214
107	110.308	20.4889	4.33	92.2241	24.3573	132.368	102.3	0.596161
108	110.05	20.3222	6.4	82.0638	52.6509	128.321	258.1	0.859727
109	110.164	20.3687	6.65	119.058	22.7767	51.428	99.2	0.577126
110	110.441	20.6414	5.61	82.3243	4.59213	19.052	39	0.361638
111	110.361	20.5801	4.06	81.5428	24.3277	63.569	121.6	0.534669
112	110.396	20.5881	4.18	79.7191	35.6082	144.509	123	0.707464
113	109.962	20.3067	7.4	166.472	5.6072	261.872	81	0.673106
114	110.406	20.3106	6.48	73.9877	24.2503	140.462	119.9	0.733503
115	109.957	20.3056	5.23	122.705	15.9475	605.867	60	0.591636
116	110.206	20.3194	4.94	206.332	7.86608	460.175	107.6	0.630743
117	109.963	20.2792	8.08	93.2662	17.798	464.222	90.8	0.760709
118	110.276	20.3394	6.08	72.6851	51.5202	201.167	153.5	0.938021
119	110.222	20.3325	4.08	184.188	11.2544	359	82.1	0.561109
120	109.971	20.3436	5.3	195.129	5.55101	136.415	101.7	0.542683
121	110.036	20.3369	4.76	127.394	41.1834	79.757	212.3	0.726945
122	110.187	20.3925	4.91	83.1059	21.1847	209.261	149.2	0.784575
123	109.964	20.3114	8.14	28.9177	13.7456	201.167	55.5	0.616242
124	110.321	20.2875	4.81	84.9295	22.4134	209.261	164.7	0.788516
125	109.956	20.3089	8.11	48.9778	18.9505	363.047	100.3	0.785933
126	110.456	20.475	6.27	35.6912	12.2725	91.898	131.1	0.596138
127	110.186	20.43	4.24	109.939	6.6893	237.59	98.9	0.576928
128	110.439	20.4272	4.91	37.7754	7.81869	164.744	114.3	0.585089
129	110.39	20.4294	4.61	26.3125	11.1867	140.462	125.5	0.518536
130	110.431	20.3889	6.43	23.9678	13.4861	294.248	168.9	0.721653
131	110.052	20.3521	5.66	44.5489	14.5256	395.423	117.1	0.716623
132	110.277	20.4054	5.27	89.0978	13.4186	164.744	129	0.672429
133	110.072	20.4022	4.61	130.521	22.5715	225.449	161.9	0.780781
134	110.409	20.5032	6.33	51.0619	59.7002	63.569	252.4	0.773579
135	110.373	20.4467	4.02	101.342	17.9767	176.885	132.5	0.665953
136	110.125	20.3661	4.52	139.899	26.1992	314.483	114.3	0.725106
137	110.38	20.4583	4.28	58.3565	32.3878	613.961	188.5	0.819618
138	109.928	20.3953	5.99	15.3707	13.4997	95.945	140.9	0.503716
139	110.343	20.4761	4.12	29.4388	20.0676	43.334	161.6	0.495501
140	110.359	20.525	5.87	62.0038	41.4988	152.603	178.7	0.868145
141	110.304	20.5127	6.37	46.6331	26.9041	205.214	161.2	0.879757
142	110.306	20.5076	4.73	70.3404	23.7021	338.765	189.9	0.79204
143	110.314	20.5325	5.48	90.661	22.4134	342.812	167.5	0.817288
144	110.423	20.4748	4.71	43.2463	15.2823	411.611	72.3	0.590314
145	109.922	20.3953	7.95	58.8775	17.6572	367.094	84.9	0.748149
146	110.386	20.4285	5.95	33.6071	7.03181	201.167	68.1	0.555431
147	110.389	20.428	5.27	28.1362	7.01072	91.898	125.5	0.472007
148	110.376	20.4244	4.88	67.9957	16.6103	298.295	80.7	0.621585
149	110.438	20.3944	4.3	95.6108	32.4502	350.906	159.8	0.820814
150	110.356	20.4581	4.71	23.9678	21.2482	104.039	160.5	0.566493
151	110.292	20.5252	4.34	46.3726	17.9948	104.039	168.9	0.621258
152	110.424	20.6515	6.11	37.7754	8.22693	23.099	52.7	0.382893
153	109.988	20.3222	6.37	17.7154	25.8331	47.381	181.5	0.558744
154	109.907	20.3889	7.41	111.242	20.2085	326.624	171.4	0.888261
155	110.281	20.4572	5.53	25.7915	28.2191	116.18	124.1	0.613173
156	110.167	20.4444	4.26	101.342	21.1966	634.847	104.5	0.667327
157	110.22	20.5096	4.36	52.104	14.1319	229.496	81.4	0.587272
158	110.109	20.3414	5.55	251.141	27.8088	500.645	103.1	0.755629
159	110.098	20.33	4.83	131.042	25.1331	278.06	97.5	0.699061
160	110.103	20.3588	4.01	180.019	25.2335	290.201	119.9	0.70919
161	110.13	20.3277	6	50.5409	26.4351	375.188	126.2	0.813735
162	110.49	20.5433	5.33	48.4567	29.7693	39.287	119.9	0.597768
163	110.394	20.4389	4.7	80.5007	51.2888	456.128	248.7	0.87876
164	110.442	20.5235	4.99	59.6591	36.5755	83.804	167.5	0.723525
165	110.412	20.5194	4.16	113.847	47.1077	136.415	185.7	0.773928
166	110.491	20.4705	5.53	39.8596	27.0416	39.287	117.1	0.585254
167	110.208	20.31	4.64	85.19	49.7606	104.039	219.3	0.75297
168	110.121	20.3683	4.5	142.765	21.9401	184.979	129.4	0.712161
169	110.421	20.5237	5.18	114.889	30.7065	59.522	171.8	0.668814
170	110.503	20.4898	6.45	23.1863	29.6132	55.475	115.7	0.551128
171	110.317	20.6047	5.41	52.3645	34.7034	213.308	222.1	0.880648
172	110.341	20.621	4.24	92.4846	14.5211	217.355	128.3	0.67802
173	110.216	20.444	4.32	51.3224	23.5662	245.684	123.4	0.720499
174	110.491	20.5039	7.66	113.326	24.746	31.193	125.5	0.675029
175	110.383	20.6206	4.67	24.7494	46.2305	306.389	252.2	0.79355
176	110.109	20.3422	4.18	156.573	23.7084	217.355	119.8	0.708055
177	110.086	20.4149	4.82	65.651	22.4537	350.906	70.9	0.630963
178	110.523	20.4892	5.54	79.1981	32.1136	95.945	131.1	0.700839
179	110.328	20.6194	5.01	67.7352	44.8476	108.086	147.9	0.769855
180	110.066	20.3336	5.98	92.2241	26.1611	265.919	152.3	0.858997
181	110.193	20.4273	5.78	69.8194	37.9514	144.509	143.7	0.830225
182	110.355	20.5739	5.56	24.4889	22.6124	79.757	123.9	0.52985
183	110.412	20.5628	5.37	112.545	32.049	35.24	170.3	0.671996
184	110.397	20.5333	5.78	153.446	2.2131	43.334	101.7	0.452338
185	110.11	20.3381	5.15	119.579	23.6134	419.705	131.6	0.772797
186	110.075	20.4086	4.46	64.609	36.6908	229.496	149.3	0.849184
187	110.264	20.2704	7	83.1059	19.6764	91.898	93.5	0.615978
188	110.136	20.342	4.5	67.9957	37.6488	395.423	185.7	0.857475
189	110.406	20.4547	4.53	91.703	52.4184	120.227	245.1	0.769031
190	110.458	20.6221	5.81	24.4889	10.1554	10.958	80.4	0.34811
191	110.456	20.6156	8.02	19.539	7.77412	160.697	70.2	0.502321
192	110.442	20.5249	6.94	19.018	6.71276	59.522	77.9	0.355166
193	110.477	20.4906	4.1	24.7494	35.6539	184.979	306.429	0.726316
194	110.151	20.3061	5.68	192.524	21.9843	504.692	117.8	0.759159
195	110.152	20.3019	5.33	174.809	53.9803	322.577	245.9	0.905814
196	110.205	20.3417	5.95	187.574	63.5241	249.731	219.3	0.932439
197	110.356	20.6372	4.3	10.1603	52.4184	31.193	216.5	0.504779
198	110.306	20.5925	4.23	27.8756	45.7781	31.193	230.4	0.599258
199	110.14	20.3025	6.07	88.3163	53.441	298.295	226.9	0.937592
200	110.238	20.2906	6.1	22.9258	53.7633	43.334	264.2	0.652323
201	110.453	20.4963	4.61	43.7674	21.6326	91.898	169.3	0.636908
202	110.237	20.2914	4.32	109.158	34.4817	172.838	141.3	0.780367
203	110.271	20.2819	4.84	154.488	41.6722	504.692	144.1	0.872972
204	110.408	20.5497	4.42	191.222	36.9245	168.791	132.9	0.775856
205	110.186	20.5088	4.48	65.9116	26.4632	128.321	120.6	0.645378
206	109.922	20.3722	5.54	96.1319	17.3106	23.099	92.3	0.484309
207	110.256	20.3056	4.12	54.9697	26.1822	241.637	306.429	0.779237
208	110.271	20.325	4.8	99.7792	29.743	318.53	132.4	0.792466
209	109.972	20.2828	8.19	49.7593	20.9475	375.188	108.7	0.813517
210	110.186	20.5172	4.91	147.454	21.0944	634.847	104.5	0.694688
211	110.128	20.3295	4.59	29.4388	22.0322	172.838	121.3	0.626617
212	110.292	20.3625	5.32	103.426	39.27	144.509	156.7	0.830192
213	110.095	20.4073	4.57	133.386	27.2328	318.53	111.5	0.727234
214	110.139	20.4335	4.46	38.557	23.5724	326.624	306.429	0.771804
215	109.987	20.3222	5.49	83.6269	30.684	87.851	146.5	0.711379
216	110.135	20.3703	5.17	101.082	21.2854	371.141	142.3	0.782485
217	110.159	20.3158	6.06	180.801	18.8906	375.188	122.7	0.768572
218	110.153	20.3088	4.53	248.797	4.98	225.449	50.3	0.50786
219	110.142	20.3508	5.15	158.396	5.73	209.261	50.3	0.534484
220	110.147	20.3023	5.32	127.915	66.1541	201.167	223.2	0.905385
221	110.108	20.3837	7.46	102.384	44.825	112.133	234.5	0.884461
222	109.926	20.3878	5.18	73.9877	46.9034	411.611	131.3	0.861973
223	109.939	20.4	7.12	113.587	35.6538	257.825	125.7	0.910612
224	109.981	20.31	5.86	67.4747	48.0798	132.368	106.6	0.754934
225	110.369	20.3311	6.1	63.0458	35.7607	43.334	175.1	0.723388
226	109.999	20.2978	6.27	38.557	31.1352	359	170.5	0.890369
227	110.018	20.3456	5.9	77.1139	17.627	148.556	94.9	0.633223
228	110.296	20.3717	6.4	127.915	18.9658	108.086	87.6	0.595361
229	109.914	20.4092	7.22	22.6652	13.42	318.53	82.5	0.613053
230	109.914	20.4033	8.35	56.2723	21.98	504.692	97.9	0.797492
231	110.017	20.3841	6.85	142.765	35.3587	168.791	127.1	0.860152
232	110.353	20.4536	4.34	101.342	24.6742	274.013	100.5	0.681541
233	109.943	20.3144	6.16	62.2643	23.7846	112.133	105.9	0.652872
234	110.029	20.3969	5.2	71.122	74.1097	549.209	216.1	0.900231
235	110.128	20.3256	4.47	81.8033	43.5047	184.979	188.8	0.849596
236	109.989	20.3694	6.32	95.3503	40.0723	132.368	178.2	0.861488
237	110.213	20.3311	6.19	79.4586	21.9401	375.188	115.7	0.776621
238	109.953	20.3875	4.64	67.2142	25.03	322.577	125.9	0.747145
239	110.389	20.3611	4.48	162.043	20.7675	79.757	118.5	0.548065
240	109.921	20.3711	8.07	113.066	9.07	411.611	53.1	0.651978
241	110.162	20.3149	4.67	84.9295	43.4179	136.415	170.5	0.795829
242	110.219	20.3267	5.62	170.38	40.0723	23.099	143.9	0.713467
243	110.299	20.3736	5.61	21.6232	15.4845	180.932	90.5	0.540846
244	110.171	20.3051	5.69	82.8454	23.7371	257.825	94.7	0.722854
245	110.164	20.3553	5.3	94.3082	15.4382	136.415	100.3	0.590849
246	110.124	20.3289	6.09	205.55	17.7672	302.342	70.9	0.660193
247	110.17	20.3033	6.65	155.53	23.6662	310.436	97.5	0.769296
248	110.171	20.3032	4.97	240.72	24.56	290.201	134.3	0.775579
249	110.406	20.3206	5.53	25.2704	66.37	23.099	306.429	0.640748
250	109.912	20.3694	8.29	36.2123	67.04	108.086	265.9	0.860139
251	110.289	20.3444	4.67	20.3206	13.0999	128.321	94.7	0.421282
252	110.153	20.3024	4.78	207.895	17.6968	253.778	92.1	0.645958
253	110.288	20.2883	4.7	18.2364	52.8091	249.731	217.9	0.758998
254	110.336	20.3392	5.67	32.044	22.0761	443.987	149.8	0.779444
255	110.342	20.3644	5.32	48.9778	52.8091	237.59	241.7	0.905385
256	110.164	20.2917	6.09	288.691	46.8971	359	93.5	0.825451
257	110.172	20.3062	6.45	157.354	0.534822	334.718	70.4	0.61111
258	110.161	20.3104	4.28	141.723	68.4817	229.496	261.5	0.860724
259	110.169	20.3766	5.53	76.3324	51.2888	342.812	237.6	0.914403
260	110.165	20.31	6.08	26.573	54.7325	423.752	251.2	0.864135
261	110.194	20.3907	4.29	110.2	20.2476	480.41	114.3	0.683091
262	110.232	20.5661	7.18	20.3206	20.0272	104.039	91.9	0.529698
263	110.173	20.3083	6.83	8.85768	19.0417	51.428	107.3	0.409515
264	110.21	20.3058	5.37	93.5267	23.8084	184.979	136.7	0.77421
265	110.185	20.3757	6.58	32.8255	71.9459	71.663	237.4	0.755228
266	110.179	20.4181	5.8	28.9177	44.5909	83.804	199.2	0.715817
267	110.159	20.3066	6.84	110.2	27.1247	156.65	114.3	0.77407
268	110.135	20.4546	5.44	139.378	51.5233	120.227	209.7	0.808109
269	110.233	20.3294	5.91	15.3707	65.9782	172.838	247.8	0.760313
270	110.411	20.5893	6.33	84.9295	56.8232	39.287	237.5	0.756157
271	110.233	20.3081	6.31	26.3125	16.3335	43.334	79.4	0.410979
272	110.428	20.5467	6.14	51.0619	33.0447	104.039	137.8	0.755425
273	110.443	20.5568	5.63	131.563	23.6062	290.201	132.9	0.795971
274	110.414	20.5275	6.15	28.3967	35.3691	10.958	174.3	0.659569
275	110.409	20.573	6.38	181.843	24.9604	23.099	145.5	0.66809
276	110.437	20.5621	6.24	51.3224	22.5163	112.133	137.1	0.711859
277	110.369	20.5804	6.54	101.342	31.8649	197.12	148.3	0.906747
278	110.263	20.3222	6.59	67.2142	49.2586	152.603	258.5	0.899064
279	110.267	20.2819	6.03	30.4808	38.9427	55.475	159.3	0.692212
280	110.499	20.4717	6.01	18.2364	24.6841	176.885	207.1	0.702868
281	110.372	20.325	7.44	150.581	55.8873	148.556	201.3	0.930369
282	110.305	20.2928	7.23	94.8293	42.374	160.697	150.9	0.93694
283	110.356	20.355	6.58	56.7934	50.3902	67.616	211.5	0.789512
284	110.176	20.4721	5.7	129.478	48.0278	124.274	215.3	0.824471
285	110.413	20.4744	6.86	35.4307	16.3335	99.992	90.7	0.571563
286	110.102	20.5104	6.02	49.7593	23.6192	116.18	117.2	0.673764
287	110.184	20.4684	5.74	61.2222	20.2476	51.428	96.1	0.518191
288	110.189	20.5185	5.78	28.9177	22.3973	55.475	130.4	0.544329
289	110.046	20.3504	6.7	177.935	51.4175	168.791	230.7	0.924573
290	110.296	20.5326	4.49	78.9376	53.7633	197.12	240.6	0.866044
291	110.146	20.4615	5.51	50.5409	22.5313	47.381	91.9	0.510413
292	110.127	20.4551	5.07	66.4326	21.3491	59.522	101.7	0.51696
293	110.214	20.3275	6.02	24.2284	59.4545	39.287	241.9	0.656055
294	110.195	20.5159	6.15	14.5891	43.5047	124.274	158.2	0.703963
295	110.16	20.3032	6.04	47.4146	70.6727	237.59	236.3	0.936303
296	110.17	20.4269	6.98	86.2321	36.6468	354.953	155.1	0.958562
297	110.187	20.4762	6.46	106.553	57.63	225.449	193.2	0.954339
298	110.133	20.4487	6.34	75.0298	15.5466	112.133	93.8	0.591917
299	110.143	20.5164	6.22	86.4926	18.8906	59.522	97.5	0.544669
300	110.078	20.3327	7.35	63.8274	54.7325	152.603	256.6	0.931701

## Sheet: Function model
						Index	Model types	Nugget C0	Sill C0+C	Nugget/sill C0/(C0+C)(%)	Residuals RSS	R2	Change process （m）
						pH	index model	0.02279	0.04568	0.498905	1.295e-05	0.941	37250
						Organic matter	index model	0.156	1.598	0.097622	0.0519	0.723	1000
						Alkali-hydrolyzable nitrogen	index model	0.0086	0.1342	0.0640835	0.0009667	0.732	1530
						Available phosphorus	index model	0.2815	0.564	0.499113	0.005809	0.889	4360
						Available potassium	index model	0.45	19.67	0.0228775	22.8	0.66	1270
			pH
									Available potassium				CHANGE	AK
			Organic matter
									CHANGE SOM
			Alkali-hydrolyzable nitrogen
															CHANGE A-N
			Available phosphorus					CHANGE	AP
