# Supplementary material for: Spatial distribution of soil nutrients and evaluation of cultivated land in Xuwen county
Source: PeerJ. 2022 Jun 30;10:e13239. doi: 10.7717/peerj.13239 (PMC9250764; doi:10.7717/peerj.13239)
Supplement: Supplemental Information 3 [file peerj-10-13239-s003.xlsx]

## Sheet: Summary table (data processing)
Order number	Soil sample number	Township(town)name	pH	Available phosphorus(mg/kg)	Organic matter(g/kg)	Available potassium(mg/kg)	Alkali-hydrolyzable nitrogen(mg/kg)	IFI index（pH、C、N、P、K）
297	524100G20160805H769	Chengbei	6.46	106.553	57.63	225.449	193.2	0.954339
265	524100G20160808H791	Chengbei	6.58	32.8255	71.9459	71.663	237.4	0.755228
65	524100G20160805H770	Chengbei	6.86	33.6071	27.0686	282.107	114.5	0.795508
96	524100G20160808H792	Chengbei	4.49	112.545	21.7654	419.705	116	0.703275
136	524100F20160804H763	Chengbei	4.52	139.899	26.1992	314.483	114.3	0.725106
39	524100G20160806H774	Chengbei	4.9	237.073	27.0416	383.282	128.6	0.774573
159	524100G20160806H775	Chengbei	4.83	131.042	25.1331	278.06	97.5	0.699061
131	524100F20160806H776	Chengbei	5.66	44.5489	14.5256	395.423	117.1	0.716623
289	524100G20160807H777	Chengbei	6.7	177.935	51.4175	168.791	230.7	0.924573
221	524100F20160804H266	Chengbei	7.46	102.384	44.825	112.133	234.5	0.884461
180	524100G20160806H779	Chengbei	5.98	92.2241	26.1611	265.919	152.3	0.858997
300	524100G20160806H778	Chengbei	7.35	63.8274	54.7325	152.603	256.6	0.931701
161	524100G20160804H762	Chengbei	6	50.5409	26.4351	375.188	126.2	0.813735
211	524100G20160804H761	Chengbei	4.59	29.4388	22.0322	172.838	121.3	0.626617
262	524100G20160807H780	Chengbei	7.18	20.3206	20.0272	104.039	91.9	0.529698
160	524100G20160807H783	Chengbei	4.01	180.019	25.2335	290.201	119.9	0.70919		指标	样点数	最小值	最大值	均值	标准差	变异系数	偏度	峰度
172	524100G20160807H782	Chengbei	4.24	92.4846	14.5211	217.355	128.3	0.67802	E	pH	300	3.69	8.35	5.55567	1.03151	0.185669	0.516253	-0.32688	E
36	524100G20160808H790	Chengbei	3.98	249.318	33.1271	156.65	139.8	0.718825	G	有机质（g/kg)	300	0.534822	74.1097	30.3313	15.0965	0.497722	0.577724	-0.174273	G
259	524100G20160808H788	Chengbei	5.53	76.3324	51.2888	342.812	237.6	0.914403	I	碱解氮(mg/kg）	300	34.8	306.429	140.703	55.1478	0.391943	0.740973	0.184321	I
188	524100G20160807H781	Chengbei	4.5	67.9957	37.6488	395.423	185.7	0.857475	F	有效磷(mg/kg）	300	5.47092	288.691	92.6303	65.2295	0.704192	1.08784	0.812033	F
71	524100G20160804H765	Chengbei	5.22	26.052	25.8642	415.658	123	0.694003	H	速效钾(mg/kg）	300	10.958	634.847	217.076	139.016	0.640403	0.691868	-0.0807455	H
168	524100G20160804H764	Chengbei	4.5	142.765	21.9401	184.979	129.4	0.712161
69	524100G20160804H760	Chengbei	6.08	21.1021	23.4624	132.368	110.4	0.578686			1级	2级	3级	4级	5级
261	524100G20160805H768	Chengbei	4.29	110.2	20.2476	480.41	114.3	0.683091		氮磷钾IFI	差	中等	一般	良好	优秀
158	524100G20160806H771	Chengbei	5.55	251.141	27.8088	500.645	103.1	0.755629			< 0.4	0.4-0.6	0.6-0.7	0.7-0.8	> 0.8
176	524100G20160806H773	Chengbei	4.18	156.573	23.7084	217.355	119.8	0.708055		个数	9	57	58	98	78	300
185	524100F20160806H772	Chengbei	5.15	119.579	23.6134	419.705	131.6	0.772797		百分比	0.03	0.19	0.193333	0.326667	0.26
216	524100F20160804H309	Chengbei	5.17	101.082	21.2854	371.141	142.3	0.782485
34	524100G20160808H787	Chengbei	5.38	92.7451	24.9104	148.556	114.6	0.689623
245	524100G20160808H785	Chengbei	5.3	94.3082	15.4382	136.415	100.3	0.590849
61	524100G20160804H766	Chengbei	6.31	19.018	27.2044	249.731	110.5	0.684341
40	524100G20160808H789	Chengbei	4.37	168.817	26.267	241.637	130	0.750431
109	524100G20160808H786	Chengbei	6.65	119.058	22.7767	51.428	99.2	0.577126
219	524100F20160808H051	Chengbei	5.15	158.396	5.73	209.261	50.3	0.534484
133	524100F20160805H767	Chengbei	4.61	130.521	22.5715	225.449	161.9	0.780781
181	524100G20160807H784	Chengbei	5.78	69.8194	37.9514	144.509	143.7	0.830225
200	524145G20160726O146	Haian	6.1	22.9258	53.7633	43.334	264.2	0.652323
202	524145G20160728O065	Haian	4.32	109.158	34.4817	172.838	141.3	0.780367
187	524145G20160726O143	Haian	7	83.1059	19.6764	91.898	93.5	0.615978
203	524145F20160728O016	Haian	4.84	154.488	41.6722	504.692	144.1	0.872972
279	524145G20160726O144	Haian	6.03	30.4808	38.9427	55.475	159.3	0.692212
95	524145F20160726O145	Haian	6.48	35.4307	49.5058	261.872	227.7	0.930054
207	524145F20160728O005	Haian	4.12	54.9697	26.1822	241.637	306.429	0.779237
93	524145F20160726O142	Haian	5.03	270.159	25.2335	221.402	83.8	0.680792
105	524155G20160729J161	Haian	5.75	68.2562	27.9987	172.838	191.6	0.824167
175	524155F20160729J002	Haian	4.67	24.7494	46.2305	306.389	252.2	0.79355
79	524155G20160729J163	Haian	4.73	105.25	7.98557	306.389	40.4	0.52717
83	524155G20160729J164	Haian	4.2	42.7253	41.5239	136.415	138.4	0.752445
198	524155G20160729J165	Haian	4.23	27.8756	45.7781	31.193	230.4	0.599258
197	524155G20160729J162	Haian	4.3	10.1603	52.4184	31.193	216.5	0.504779
171	524155G20160729J069	Haian	5.41	52.3645	34.7034	213.308	222.1	0.880648
179	524155G20160729J032	Haian	5.01	67.7352	44.8476	108.086	147.9	0.769855
123	524146F20160725M057	Jiaowei	8.14	28.9177	13.7456	201.167	55.5	0.616242
125	524146F20160725M056	Jiaowei	8.11	48.9778	18.9505	363.047	100.3	0.785933
233	524146G20160725M116	Jiaowei	6.16	62.2643	23.7846	112.133	105.9	0.652872
113	524100F20160725M055	Jiaowei	7.4	166.472	5.6072	261.872	81	0.673106
115	524146G20160725M119	Jiaowei	5.23	122.705	15.9475	605.867	60	0.591636
117	524146G20160725M117	Jiaowei	8.08	93.2662	17.798	464.222	90.8	0.760709
209	524146G20160725M118	Jiaowei	8.19	49.7593	20.9475	375.188	108.7	0.813517
275	524133G20160730B368	Jinhe	6.38	181.843	24.9604	23.099	145.5	0.66809
274	524133G20160731B373	Jinhe	6.15	28.3967	35.3691	10.958	174.3	0.659569
273	524133G20160731B378	Jinhe	5.63	131.563	23.6062	290.201	132.9	0.795971
26	524133G20160731B379	Jinhe	6.37	40.1201	48.679	43.334	181.8	0.757875
27	524133G20160731B380	Jinhe	4.26	288.691	53.2486	47.381	207	0.667265
183	524133F20160731B169	Jinhe	5.37	112.545	32.049	35.24	170.3	0.671996
204	524133F20160731B162	Jinhe	4.42	191.222	36.9245	168.791	132.9	0.775856
272	524133G20160731B374	Jinhe	6.14	51.0619	33.0447	104.039	137.8	0.755425
111	524133G20160730B370	Jinhe	4.06	81.5428	24.3277	63.569	121.6	0.534669
182	524133F20160730B106	Jinhe	5.56	24.4889	22.6124	79.757	123.9	0.52985
270	524133G20160730B369	Jinhe	6.33	84.9295	56.8232	39.287	237.5	0.756157
277	524133G20160730B372	Jinhe	6.54	101.342	31.8649	197.12	148.3	0.906747
112	524133G20160730B371	Jinhe	4.18	79.7191	35.6082	144.509	123	0.707464
164	524133G20160731B377	Jinhe	4.99	59.6591	36.5755	83.804	167.5	0.723525
165	524133G20160731B376	Jinhe	4.16	113.847	47.1077	136.415	185.7	0.773928
169	524133F20160731B375	Jinhe	5.18	114.889	30.7065	59.522	171.8	0.668814
276	524133G20160731B381	Jinhe	6.24	51.3224	22.5163	112.133	137.1	0.711859
52	524139G20160726C661	Longtang	6.65	56.7934	54.1154	55.475	159.4	0.776928
46	524139G20160726C657	Longtang	6.23	233.165	24.2543	241.637	95	0.749436
51	524139G20160726C663	Longtang	5.98	15.8917	17.2264	180.932	75.1	0.503802
49	524139G20160726C652	Longtang	4.92	105.511	30.7272	87.851	159.4	0.694135
124	524139F20160725C004	Longtang	4.81	84.9295	22.4134	209.261	164.7	0.788516
243	524139G20160727C668	Longtang	5.61	21.6232	15.4845	180.932	90.5	0.540846
212	524139F20160725C647	Longtang	5.32	103.426	39.27	144.509	156.7	0.830192
228	524139F20160725C648	Longtang	6.4	127.915	18.9658	108.086	87.6	0.595361
114	524139F20160725C156	Longtang	6.48	73.9877	24.2503	140.462	119.9	0.733503
283	524139G20160726C658	Longtang	6.58	56.7934	50.3902	67.616	211.5	0.789512
68	524139G20160725C650	Longtang	4.39	127.394	35.5372	197.12	127.2	0.792051
118	524139F20160725C252	Longtang	6.08	72.6851	51.5202	201.167	153.5	0.938021
208	524139F20160725C649	Longtang	4.8	99.7792	29.743	318.53	132.4	0.792466
251	524139G20160727C666	Longtang	4.67	20.3206	13.0999	128.321	94.7	0.421282
278	524139F20160725C651	Longtang	6.59	67.2142	49.2586	152.603	258.5	0.899064
255	524139G20160727C667	Longtang	5.32	48.9778	52.8091	237.59	241.7	0.905385
253	524139G20160727C671	Longtang	4.7	18.2364	52.8091	249.731	217.9	0.758998
282	524139G20160726C662	Longtang	7.23	94.8293	42.374	160.697	150.9	0.93694
50	524139G20160726C654	Longtang	4.46	197.214	32.9618	310.436	121.6	0.773647
254	524139G20160727C670	Longtang	5.67	32.044	22.0761	443.987	149.8	0.779444
56	524139G20160726C664	Longtang	6.15	19.7995	24.846	359	104.5	0.657035
54	524139G20160726C653	Longtang	4.9	82.0638	27.5862	83.804	125.8	0.622718
59	524139G20160726C660	Longtang	6.69	92.4846	37.6739	95.945	122.2	0.762449
249	524139G20160727C669	Longtang	5.53	25.2704	66.37	23.099	306.429	0.640748
1	524139G20160726C665	Longtang	6.2	123.226	39.339	346.859	149.5	0.938605
281	524139G20160726C655	Longtang	7.44	150.581	55.8873	148.556	201.3	0.930369
48	524139G20160726C659	Longtang	4.48	288.691	35.4251	274.013	197.3	0.844608
239	524139G20160727C672	Longtang	4.48	162.043	20.7675	79.757	118.5	0.548065
57	524139G20160726C656	Longtang	6.29	94.0477	29.5653	407.564	102.4	0.795492
225	524146F20160727I708	Maichen	6.1	63.0458	35.7607	43.334	175.1	0.723388
3	524146G20160728I709	Maichen	4.2	220.921	26.4805	516.833	128.5	0.741283
120	524146F20160728I161	Maichen	5.3	195.129	5.55101	136.415	101.7	0.542683
6	524146G20160729I726	Maichen	4.8	55.4908	21.9073	189.026	101.9	0.675063
10	524146G20160729I727	Maichen	5.14	7.29456	9.38208	265.919	64.1	0.380545
12	524146G20160728I713	Maichen	5.62	288.691	19.8571	419.705	118.7	0.746896
15	524146G20160727I698	Maichen	5.56	43.5068	35.6397	322.577	138.3	0.868745
98	524146G20160728I714	Maichen	6.1	141.202	50.139	310.436	213.6	0.93888
215	524146F20160727I702	Maichen	5.49	83.6269	30.684	87.851	146.5	0.711379
106	524146F20160728I703	Maichen	7.04	103.687	52.4414	124.274	131.1	0.844214
18	524146G20160727I706	Maichen	4.4	113.847	48.8249	87.851	176.1	0.721878
14	524146G20160727I707	Maichen	5.36	61.4827	32.451	233.543	122.9	0.812138
75	524146G20160728I715	Maichen	7.56	86.7532	33.0277	269.966	166.4	0.96135
11	524146G20160728I717	Maichen	6.9	150.32	19.9362	492.551	92.4	0.74969
80	524146G20160728I716	Maichen	8.03	56.2723	33.1708	282.107	115.5	0.893122
84	524146G20160729I723	Maichen	4.8	215.45	40.3444	342.812	108.7	0.800454
8	524146G20160729I721	Maichen	4.45	140.941	23.3242	367.094	99.2	0.676375
9	524146G20160729I722	Maichen	5.27	52.8856	17.4591	265.919	104.7	0.690917
231	524146G20160729I724	Maichen	6.85	142.765	35.3587	168.791	127.1	0.860152
74	524146G20160727I699	Maichen	5.71	176.633	37.4893	407.564	163.6	0.908574
224	524146F20160727I701	Maichen	5.86	67.4747	48.0798	132.368	106.6	0.754934
13	524146G20160728I710	Maichen	4.56	141.202	31.0699	630.149	138.3	0.801125
100	524146G20160728I712	Maichen	7.22	47.9357	8.95934	265.919	99.2	0.717756
236	524146G20160728I711	Maichen	6.32	95.3503	40.0723	132.368	178.2	0.861488
2	524146G20160729I719	Maichen	5.02	288.691	30.0026	233.543	129.9	0.798316
227	524146G20160729I718	Maichen	5.9	77.1139	17.627	148.556	94.9	0.633223
16	524146G20160729I720	Maichen	4.26	156.573	29.9726	326.624	128.5	0.762717
121	524146F20160728I153	Maichen	4.76	127.394	41.1834	79.757	212.3	0.726945
234	524146G20160729I725	Maichen	5.2	71.122	74.1097	549.209	216.1	0.900231
153	524146F20160727I700	Maichen	6.37	17.7154	25.8331	47.381	181.5	0.558744
119	524146F20160728I044	Maichen	4.08	184.188	11.2544	359	82.1	0.561109
108	524146F20160727I705	Maichen	6.4	82.0638	52.6509	128.321	258.1	0.859727
226	524146F20160727I704	Maichen	6.27	38.557	31.1352	359	170.5	0.890369
235	524100G20160726G728	Nanshan	4.47	81.8033	43.5047	184.979	188.8	0.849596
246	524100G20160726G727	Nanshan	6.09	205.55	17.7672	302.342	70.9	0.660193
28	524100G20160727G733	Nanshan	6.22	116.192	25.3582	367.094	96.4	0.757767
29	524100G20160727G732	Nanshan	6.36	85.4506	27.7811	294.248	124.9	0.833863
30	524100G20160728G737	Nanshan	6.37	17.9759	23.2318	172.838	127.2	0.658255
73	524100G20160728G739	Nanshan	4.91	79.4586	19.6268	427.799	85.2	0.648163
244	524100G20160728G735	Nanshan	5.69	82.8454	23.7371	257.825	94.7	0.722854
247	524100G20160729G741	Nanshan	6.65	155.53	23.6662	310.436	97.5	0.769296
248	524100G20160729G742	Nanshan	4.97	240.72	24.56	290.201	134.3	0.775579
263	524100G20160728G738	Nanshan	6.83	8.85768	19.0417	51.428	107.3	0.409515
256	524100G20160728G736	Nanshan	6.09	288.691	46.8971	359	93.5	0.825451
257	524100G20160728G737	Nanshan	6.45	157.354	0.534822	334.718	70.4	0.61111
32	524100G20160727G731	Nanshan	6.28	66.6931	47.0607	298.295	190.2	0.94661
258	524100G20160728G734	Nanshan	4.28	141.723	68.4817	229.496	261.5	0.860724
260	524100G20160727G730	Nanshan	6.08	26.573	54.7325	423.752	251.2	0.864135
267	524100G20160726G723	Nanshan	6.84	110.2	27.1247	156.65	114.3	0.77407
295	524100G20160726G722	Nanshan	6.04	47.4146	70.6727	237.59	236.3	0.936303
220	524100F20160726G718	Nanshan	5.32	127.915	66.1541	201.167	223.2	0.905385
252	524100G20160726G726	Nanshan	4.78	207.895	17.6968	253.778	92.1	0.645958
37	524100G20160726G724	Nanshan	5.56	248.276	11.1979	338.765	120.7	0.70156
194	524100F20160726G721	Nanshan	5.68	192.524	21.9843	504.692	117.8	0.759159
195	524100F20160726G719	Nanshan	5.33	174.809	53.9803	322.577	245.9	0.905814
218	524100F20160726G720	Nanshan	4.53	248.797	4.98	225.449	50.3	0.50786
82	524100F20160727G010	Nanshan	5.32	216.492	23.8801	492.551	145.1	0.808537
199	524100F20160726G725	Nanshan	6.07	88.3163	53.441	298.295	226.9	0.937592
92	524100F20160727G015	Nanshan	5.74	288.691	26.5413	407.564	134.9	0.820544
217	524100F20160726G717	Nanshan	6.06	180.801	18.8906	375.188	122.7	0.768572
241	524100G20160727G729	Nanshan	4.67	84.9295	43.4179	136.415	170.5	0.795829
237	524100G20160729G747	Nanshan	6.19	79.4586	21.9401	375.188	115.7	0.776621
242	524100G20160729G745	Nanshan	5.62	170.38	40.0723	23.099	143.9	0.713467
264	524100G20160729G743	Nanshan	5.37	93.5267	23.8084	184.979	136.7	0.77421
269	524100G20160729G746	Nanshan	5.91	15.3707	65.9782	172.838	247.8	0.760313
271	524100G20160729G744	Nanshan	6.31	26.3125	16.3335	43.334	79.4	0.410979
293	524100G20160729G748	Nanshan	6.02	24.2284	59.4545	39.287	241.9	0.656055
91	524100F20160727G027	Nanshan	5.8	260.781	26.6753	371.141	103.4	0.760844
22	524137G20160729A407	Qianshan	6.09	40.9016	31.2895	132.368	92.2	0.688974
23	524137G20160729A405	Qianshan	5.6	99.5186	44.126	140.462	138.4	0.817762
70	524137F20160728A032	Qianshan	5.63	108.897	18.9094	136.415	77.9	0.578964
24	524137G20160729A404	Qianshan	5.79	175.59	45.9942	87.851	145.5	0.772568
126	524137F20160728A402	Qianshan	6.27	35.6912	12.2725	91.898	131.1	0.596138
130	524137F20160728A403	Qianshan	6.43	23.9678	13.4861	294.248	168.9	0.721653
128	524137F20160728A400	Qianshan	4.91	37.7754	7.81869	164.744	114.3	0.585089
129	524137F20160728A401	Qianshan	4.61	26.3125	11.1867	140.462	125.5	0.518536
38	524137G20160729A412	Qianshan	5.75	165.17	64.8596	55.475	202.2	0.73828
35	524137G20160729A414	Qianshan	6.64	103.947	64.9894	148.556	196.4	0.896015
19	524137G20160729A411	Qianshan	6.74	50.0198	10.6323	59.522	37.5	0.447404
31	524137G20160729A409	Qianshan	6.87	190.44	31.08	184.979	94.3	0.793091
72	524137F20160728A002	Qianshan	6.65	26.573	25.897	415.658	104.7	0.721856
25	524137G20160729A406	Qianshan	5.6	273.807	42.7257	43.334	130.7	0.686209
63	524137F20160728A025	Qianshan	4.95	135.991	16.489	233.543	86.3	0.635137
21	524137G20160729A408	Qianshan	6.35	229.518	31.4769	83.804	103.6	0.661595
17	524137G20160729A410	Qianshan	4.67	84.148	39.1526	205.214	104.7	0.782296
33	524137G20160729A413	Qianshan	6.47	119.579	47.62	298.295	131.8	0.918369
142	524132G20160811E742	Qujie	4.73	70.3404	23.7021	338.765	189.9	0.79204
189	524132T20160811E002	Qujie	4.53	91.703	52.4184	120.227	245.1	0.769031
58	524132G20160808E750	Qujie	4.37	56.0118	37.8325	140.462	172	0.776438
44	524132G20160810E755	Qujie	5.73	5.47092	28.7373	108.086	118.1	0.490346
140	524132G20160810E737	Qujie	5.87	62.0038	41.4988	152.603	178.7	0.868145
42	524132G20160808E752	Qujie	4.19	34.1281	15.2354	87.851	78.1	0.403019
55	524132G20160808E749	Qujie	4.42	5.99196	42.6357	79.757	177.6	0.525203
146	524132G20160808E732	Qujie	5.95	33.6071	7.03181	201.167	68.1	0.555431
147	524132G20160808E733	Qujie	5.27	28.1362	7.01072	91.898	125.5	0.472007
148	524132G20160808E731	Qujie	4.88	67.9957	16.6103	298.295	80.7	0.621585
163	524132G20160808E734	Qujie	4.7	80.5007	51.2888	456.128	248.7	0.87876
53	524132G20160808E753	Qujie	4.4	82.3243	41.2432	322.577	181.7	0.865877
232	524132G20160807E729	Qujie	4.34	101.342	24.6742	274.013	100.5	0.681541
150	524132G20160807E745	Qujie	4.71	23.9678	21.2482	104.039	160.5	0.566493
135	524132G20160807E730	Qujie	4.02	101.342	17.9767	176.885	132.5	0.665953
137	524132G20160807E746	Qujie	4.28	58.3565	32.3878	613.961	188.5	0.819618
47	524132G20160810E758	Qujie	4.27	53.1461	40.208	290.201	120.2	0.800695
7	524132G20160808E760	Qujie	4.17	84.9295	37.3417	472.316	141.1	0.823845
20	524132G20160810E759	Qujie	4.18	21.6232	28.9013	193.073	132.3	0.651077
141	524132G20160811E743	Qujie	6.37	46.6331	26.9041	205.214	161.2	0.879757
107	524132T20160811E001	Qujie	4.33	92.2241	24.3573	132.368	102.3	0.596161
43	524132G20160811E761	Qujie	4.45	38.557	41.2845	156.65	160.7	0.804422
45	524132G20160810E754	Qujie	4.67	116.973	31.1955	257.825	124.4	0.778727
139	524132G20160807E747	Qujie	4.12	29.4388	20.0676	43.334	161.6	0.495501
143	524132G20160811E740	Qujie	5.48	90.661	22.4134	342.812	167.5	0.817288
151	524132G20160811E744	Qujie	4.34	46.3726	17.9948	104.039	168.9	0.621258
144	524132G20160808E748	Qujie	4.71	43.2463	15.2823	411.611	72.3	0.590314
285	524132G20160808E735	Qujie	6.86	35.4307	16.3335	99.992	90.7	0.571563
4	524132G20160808E751	Qujie	4.15	145.891	50.9926	124.274	227.8	0.757909
134	524132G20160808E736	Qujie	6.33	51.0619	59.7002	63.569	252.4	0.773579
5	524132G20160808E757	Qujie	4.2	36.7333	50.2616	184.979	215.3	0.820026
41	524132G20160810E756	Qujie	4.2	92.7451	19.6993	168.791	96.3	0.600193
132	524132G20160810E738	Qujie	5.27	89.0978	13.4186	164.744	129	0.672429
155	524132G20160810E739	Qujie	5.53	25.7915	28.2191	116.18	124.1	0.613173
103	524132T20160811E003	Qujie	4.79	57.0539	52.546	533.021	240.3	0.882625
290	524132G20160811E741	Qujie	4.49	78.9376	53.7633	197.12	240.6	0.866044
238	524147G20160726K305	Xilian	4.64	67.2142	25.03	322.577	125.9	0.747145
88	524147F20160726K306	Xilian	7.22	84.9295	35.2886	399.47	156.3	0.961535
206	524147F20160726K107	Xilian	5.54	96.1319	17.3106	23.099	92.3	0.484309
250	524147G20160726K308	Xilian	8.29	36.2123	67.04	108.086	265.9	0.860139
222	524147F20160726K026	Xilian	5.18	73.9877	46.9034	411.611	131.3	0.861973
138	524147G20160726K303	Xilian	5.99	15.3707	13.4997	95.945	140.9	0.503716
240	524147G20160726K307	Xilian	8.07	113.066	9.07	411.611	53.1	0.651978
145	524147G20160725K299	Xilian	7.95	58.8775	17.6572	367.094	84.9	0.748149
223	524147F20160725K298	Xilian	7.12	113.587	35.6538	257.825	125.7	0.910612
229	524147F20160726K302	Xilian	7.22	22.6652	13.42	318.53	82.5	0.613053
90	524147F20160726K304	Xilian	6.3	85.7111	30.6231	278.06	89.1	0.775034
154	524147F20160726K132	Xilian	7.41	111.242	20.2085	326.624	171.4	0.888261
230	524147G20160726K301	Xilian	8.35	56.2723	21.98	504.692	97.9	0.797492
62	524147F20160725K300	Xilian	6.18	92.2241	27.3418	354.953	104.4	0.782761
87	524148G20160726D716	Xiaqiao	4.76	25.531	11.552	160.697	53	0.417631
64	524148G20160726D724	Xiaqiao	4.88	16.1522	35.3609	87.851	135.6	0.557409
77	524148G20160726D723	Xiaqiao	4.89	16.6733	11.4251	128.321	58.6	0.332215
157	524148G20160726D725	Xiaqiao	4.36	52.104	14.1319	229.496	81.4	0.587272
85	524148G20160726D722	Xiaqiao	4.16	40.1201	36.9427	160.697	130	0.748597
291	524148G20160730D737	Xiaqiao	5.51	50.5409	22.5313	47.381	91.9	0.510413
284	524148F20160727D113	Xiaqiao	5.7	129.478	48.0278	124.274	215.3	0.824471
292	524148G20160801D740	Xiaqiao	5.07	66.4326	21.3491	59.522	101.7	0.51696
296	524148G20160729D736	Xiaqiao	6.98	86.2321	36.6468	354.953	155.1	0.958562
298	524148G20160803D739	Xiaqiao	6.34	75.0298	15.5466	112.133	93.8	0.591917
122	524148F20160726D023	Xiaqiao	4.91	83.1059	21.1847	209.261	149.2	0.784575
205	524148F20160726D717	Xiaqiao	4.48	65.9116	26.4632	128.321	120.6	0.645378
294	524148G20160726D718	Xiaqiao	6.15	14.5891	43.5047	124.274	158.2	0.703963
94	524148G20160726D726	Xiaqiao	4.28	11.7234	50.3894	176.885	236.2	0.675442
210	524148F20160726D720	Xiaqiao	4.91	147.454	21.0944	634.847	104.5	0.694688
288	524148G20160726D726	Xiaqiao	5.78	28.9177	22.3973	55.475	130.4	0.544329
89	524148G20160726D721	Xiaqiao	4.64	91.9636	35.859	302.342	125.8	0.805422
214	524148F20160727D727	Xiaqiao	4.46	38.557	23.5724	326.624	306.429	0.771804
268	524148G20160807D741	Xiaqiao	5.44	139.378	51.5233	120.227	209.7	0.808109
102	524148F20160728D734	Xiaqiao	6.11	140.42	26.958	79.757	170.6	0.714491
127	524148F20160727D066	Xiaqiao	4.24	109.939	6.6893	237.59	98.9	0.576928
81	524148G20160727D730	Xiaqiao	4.27	24.2284	10.2889	136.415	60	0.351422
173	524148G20160727D731	Xiaqiao	4.32	51.3224	23.5662	245.684	123.4	0.720499
97	524148G20160726D728	Xiaqiao	4.41	110.46	25.3858	112.133	122.7	0.619969
287	524148G20160727D729	Xiaqiao	5.74	61.2222	20.2476	51.428	96.1	0.518191
101	524148G20160803D743	Xiaqiao	4.92	123.486	12.3589	233.543	95	0.628946
177	524148G20160803D742	Xiaqiao	4.82	65.651	22.4537	350.906	70.9	0.630963
213	524148F20160803D745	Xiaqiao	4.57	133.386	27.2328	318.53	111.5	0.727234
286	524148G20160728D735	Xiaqiao	6.02	49.7593	23.6192	116.18	117.2	0.673764
299	524148G20160803D746	Xiaqiao	6.22	86.4926	18.8906	59.522	97.5	0.544669
266	524148G20160730D738	Xiaqiao	5.8	28.9177	44.5909	83.804	199.2	0.715817
99	524148G20160728D733	Xiaqiao	3.69	133.126	12.7369	229.496	54.4	0.504779
156	524148G20160727D732	Xiaqiao	4.26	101.342	21.1966	634.847	104.5	0.667327
186	524148F20160803D744	Xiaqiao	4.46	64.609	36.6908	229.496	149.3	0.849184
201	524136G20160809F224	Xiayang	4.61	43.7674	21.6326	91.898	169.3	0.636908
184	524136T20160809F002	Xiayang	5.78	153.446	2.2131	43.334	101.7	0.452338
170	524136G20160809F220	Xiayang	6.45	23.1863	29.6132	55.475	115.7	0.551128
178	524136G20160809F221	Xiayang	5.54	79.1981	32.1136	95.945	131.1	0.700839
162	524136G20160809F222	Xiayang	5.33	48.4567	29.7693	39.287	119.9	0.597768
166	524136G20160809F223	Xiayang	5.53	39.8596	27.0416	39.287	117.1	0.585254
280	524136T20160809F001	Xiayang	6.01	18.2364	24.6841	176.885	207.1	0.702868
174	524136G20160809F219	Xiayang	7.66	113.326	24.746	31.193	125.5	0.675029
149	524136T20160809F003	Xiayang	4.3	95.6108	32.4502	350.906	159.8	0.820814
193	524136G20160809F225	Xiayang	4.1	24.7494	35.6539	184.979	306.429	0.726316
110	524134G20160728L232	Xinliao	5.61	82.3243	4.59213	19.052	39	0.361638
66	524134F20160728L026	Xinliao	6.78	7.55508	11.448	59.522	34.8	0.274987
67	524134F20160728L002	Xinliao	5.41	45.8515	4.54148	27.146	37.6	0.353049
190	524134F20160728L231	Xinliao	5.81	24.4889	10.1554	10.958	80.4	0.34811
192	524134F20160728L236	Xinliao	6.94	19.018	6.71276	59.522	77.9	0.355166
104	524134G20160728L234	Xinliao	8.18	13.2865	18.4734	55.475	107.8	0.465786
191	524134G20160728L233	Xinliao	8.02	19.539	7.77412	160.697	70.2	0.502321
60	524134F20160728L053	Xinliao	5.46	25.2704	22.5763	23.099	100.3	0.444254
152	524134G20160728L235	Xinliao	6.11	37.7754	8.22693	23.099	52.7	0.382893
86	524100F20160726N002	Xucheng	6.71	206.332	35.9676	468.269	145.4	0.9341
116	524100N20160726N070	Xucheng	4.94	206.332	7.86608	460.175	107.6	0.630743
78	524100F20160729N071	Xucheng	5.68	123.747	17.0895	359	106.2	0.709527
196	524100N20160729N072	Xucheng	5.95	187.574	63.5241	249.731	219.3	0.932439
167	524100F20160729N017	Xucheng	4.64	85.19	49.7606	104.039	219.3	0.75297
76	524100F20160729N007	Xucheng	4.97	39.3385	53.4788	342.812	207	0.886715

## Sheet: IFI index
Order number	IFI index（pH、C、N、P、K）
1	0.938605
2	0.798316
3	0.741283
4	0.757909
5	0.820026
6	0.675063
7	0.823845
8	0.676375
9	0.690917
10	0.380545
11	0.74969
12	0.746896
13	0.801125
14	0.812138
15	0.868745
16	0.762717
17	0.782296
18	0.721878
19	0.447404
20	0.651077
21	0.661595
22	0.688974
23	0.817762
24	0.772568
25	0.686209
26	0.757875
27	0.667265
28	0.757767
29	0.833863
30	0.658255
31	0.793091
32	0.94661
33	0.918369
34	0.689623
35	0.896015
36	0.718825
37	0.70156
38	0.73828
39	0.774573
40	0.750431
41	0.600193
42	0.403019
43	0.804422
44	0.490346
45	0.778727
46	0.749436
47	0.800695
48	0.844608
49	0.694135
50	0.773647
51	0.503802
52	0.776928
53	0.865877
54	0.622718
55	0.525203
56	0.657035
57	0.795492
58	0.776438
59	0.762449
60	0.444254
61	0.684341
62	0.782761
63	0.635137
64	0.557409
65	0.795508
66	0.274987
67	0.353049
68	0.792051
69	0.578686
70	0.578964
71	0.694003
72	0.721856
73	0.648163
74	0.908574
75	0.96135
76	0.886715
77	0.332215
78	0.709527
79	0.52717
80	0.893122
81	0.351422
82	0.808537
83	0.752445
84	0.800454
85	0.748597
86	0.9341
87	0.417631
88	0.961535
89	0.805422
90	0.775034
91	0.760844
92	0.820544
93	0.680792
94	0.675442
95	0.930054
96	0.703275
97	0.619969
98	0.93888
99	0.504779
100	0.717756
101	0.628946
102	0.714491
103	0.882625
104	0.465786
105	0.824167
106	0.844214
107	0.596161
108	0.859727
109	0.577126
110	0.361638
111	0.534669
112	0.707464
113	0.673106
114	0.733503
115	0.591636
116	0.630743
117	0.760709
118	0.938021
119	0.561109
120	0.542683
121	0.726945
122	0.784575
123	0.616242
124	0.788516
125	0.785933
126	0.596138
127	0.576928
128	0.585089
129	0.518536
130	0.721653
131	0.716623
132	0.672429
133	0.780781
134	0.773579
135	0.665953
136	0.725106
137	0.819618
138	0.503716
139	0.495501
140	0.868145
141	0.879757
142	0.79204
143	0.817288
144	0.590314
145	0.748149
146	0.555431
147	0.472007
148	0.621585
149	0.820814
150	0.566493
151	0.621258
152	0.382893
153	0.558744
154	0.888261
155	0.613173
156	0.667327
157	0.587272
158	0.755629
159	0.699061
160	0.70919
161	0.813735
162	0.597768
163	0.87876
164	0.723525
165	0.773928
166	0.585254
167	0.75297
168	0.712161
169	0.668814
170	0.551128
171	0.880648
172	0.67802
173	0.720499
174	0.675029
175	0.79355
176	0.708055
177	0.630963
178	0.700839
179	0.769855
180	0.858997
181	0.830225
182	0.52985
183	0.671996
184	0.452338
185	0.772797
186	0.849184
187	0.615978
188	0.857475
189	0.769031
190	0.34811
191	0.502321
192	0.355166
193	0.726316
194	0.759159
195	0.905814
196	0.932439
197	0.504779
198	0.599258
199	0.937592
200	0.652323
201	0.636908
202	0.780367
203	0.872972
204	0.775856
205	0.645378
206	0.484309
207	0.779237
208	0.792466
209	0.813517
210	0.694688
211	0.626617
212	0.830192
213	0.727234
214	0.771804
215	0.711379
216	0.782485
217	0.768572
218	0.50786
219	0.534484
220	0.905385
221	0.884461
222	0.861973
223	0.910612
224	0.754934
225	0.723388
226	0.890369
227	0.633223
228	0.595361
229	0.613053
230	0.797492
231	0.860152
232	0.681541
233	0.652872
234	0.900231
235	0.849596
236	0.861488
237	0.776621
238	0.747145
239	0.548065
240	0.651978
241	0.795829
242	0.713467
243	0.540846
244	0.722854
245	0.590849
246	0.660193
247	0.769296
248	0.775579
249	0.640748
250	0.860139
251	0.421282
252	0.645958
253	0.758998
254	0.779444
255	0.905385
256	0.825451
257	0.61111
258	0.860724
259	0.914403
260	0.864135
261	0.683091
262	0.529698
263	0.409515
264	0.77421
265	0.755228
266	0.715817
267	0.77407
268	0.808109
269	0.760313
270	0.756157
271	0.410979
272	0.755425
273	0.795971
274	0.659569
275	0.66809
276	0.711859
277	0.906747
278	0.899064
279	0.692212
280	0.702868
281	0.930369
282	0.93694
283	0.789512
284	0.824471
285	0.571563			Maximum value	Minimum value	Standard deviation	Peak		Bias angle
286	0.673764						Statistics	Standard error	Statistics	Standard error
287	0.518191		IFI	0.9615	0.275	0.1413	0.552	0.141	0.02	0.281
288	0.544329
289	0.924573
290	0.866044
291	0.510413
292	0.51696
293	0.656055
294	0.703963
295	0.936303
296	0.958562
297	0.954339
298	0.591917
299	0.544669
300	0.931701
